# Supplementary material
Source: PubMed Central journal article supplement (PMC6379104)

**Figure S1.** Goodness of fit plots for the final seven-compartment pharmacokinetic (PK) model incorporating plasma concentrations of disulfiram (DSF) and its metabolites: M1 (N,N-diethyldithiocarbamate, or DDTC), M2 (diethyldithiocarbamate-methyl ester, or DDTC-Me), M3 (S-methyl-N,N-diethylthiolcarbamate sulfoxide, or DETC-MeSO), and M4 (carbamathione).

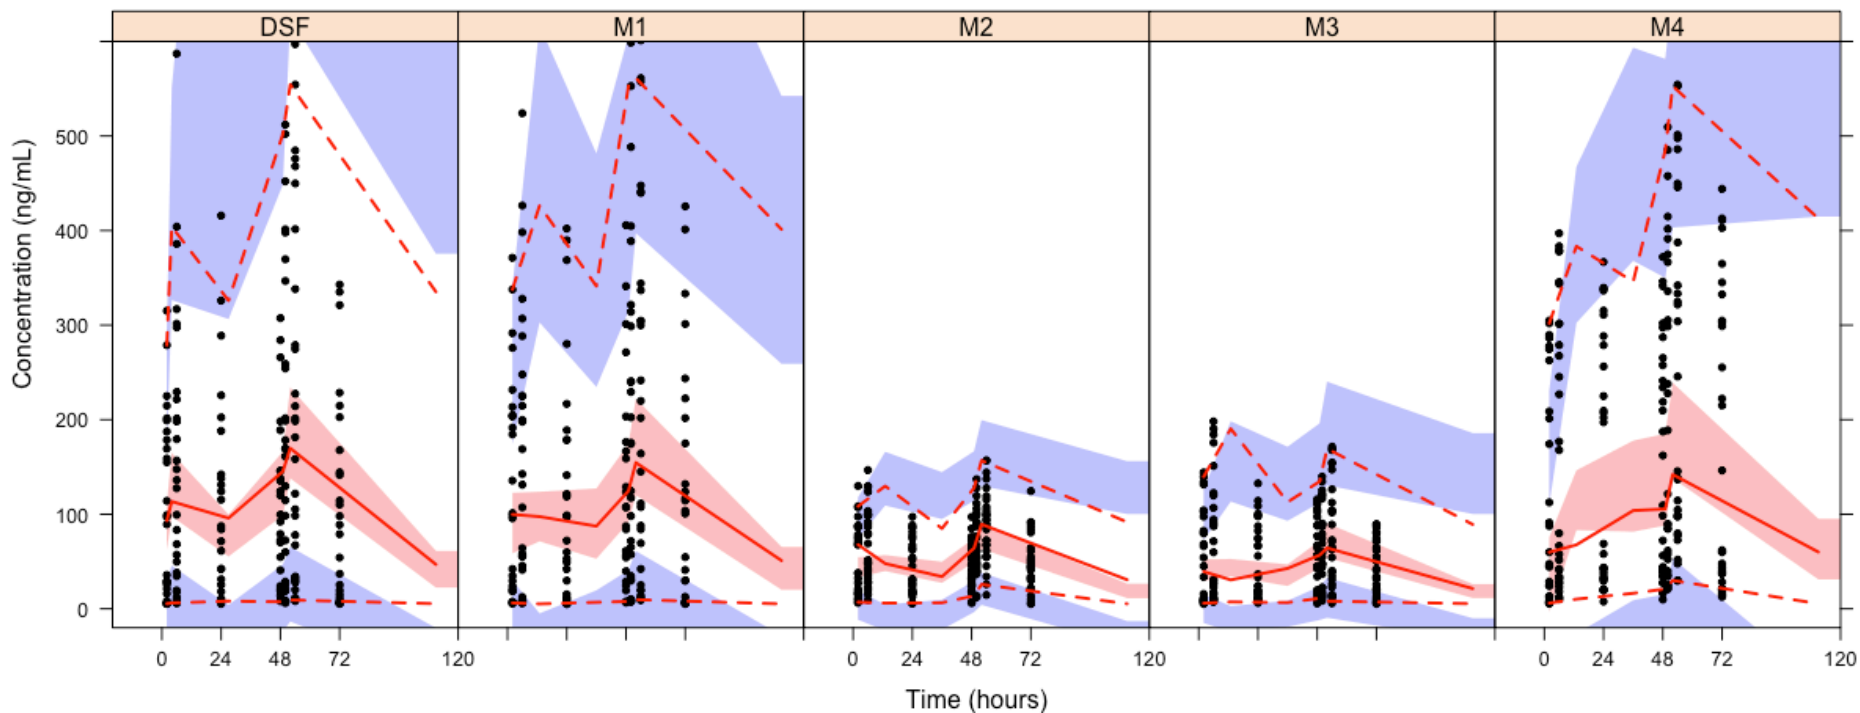

Supplement: NIHMS986651-supplement-Supp_FigS1.pdf [file NIHMS986651-supplement-Supp_FigS1.pdf]
