# Supplementary material
Source: PubMed Central journal article supplement (PMC6379104)

**Figure S2.** Raw pharmacodynamic data by disulfiram dosing group over the entire study period (day 0 to 31). HIV RNA was quantified using two different assays and count-based methods (Supplemental Methods): cell-associated unspliced (CA-US) HIV RNA (copies/10<sup>6</sup> CD4+ T cells; LLOD of 1 copy/well) (A) and plasma HIV RNA (copies/mL; typical LLOD of 0.19 copies/mL) (B).

**A.**

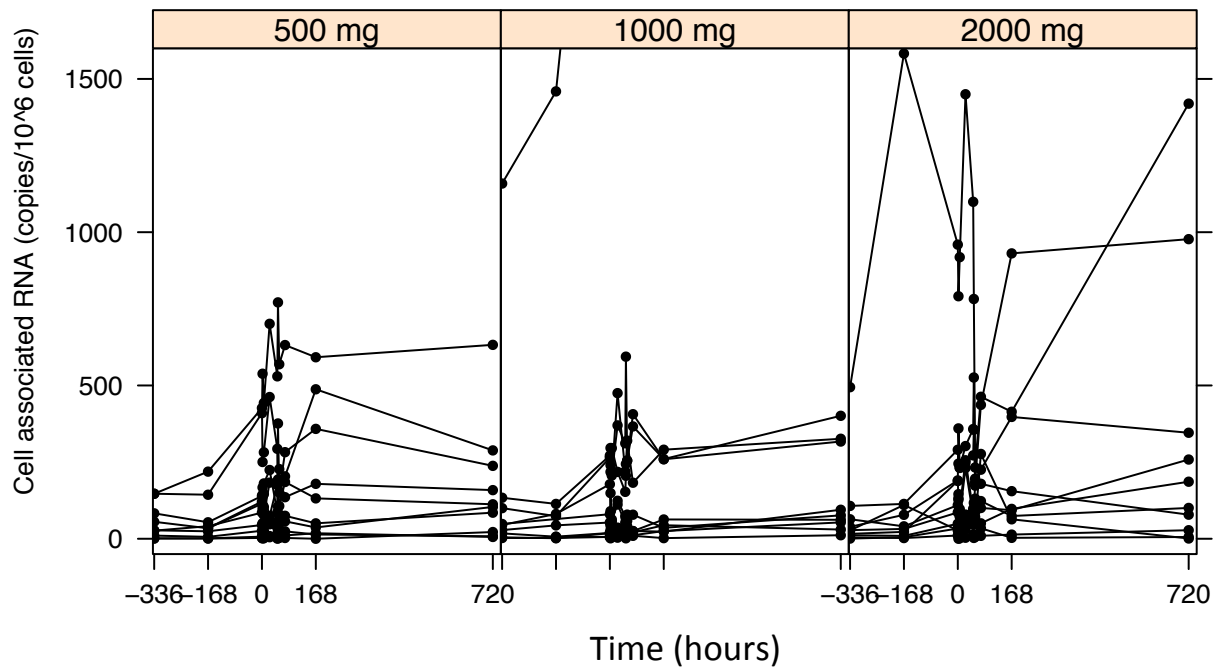

**B.**

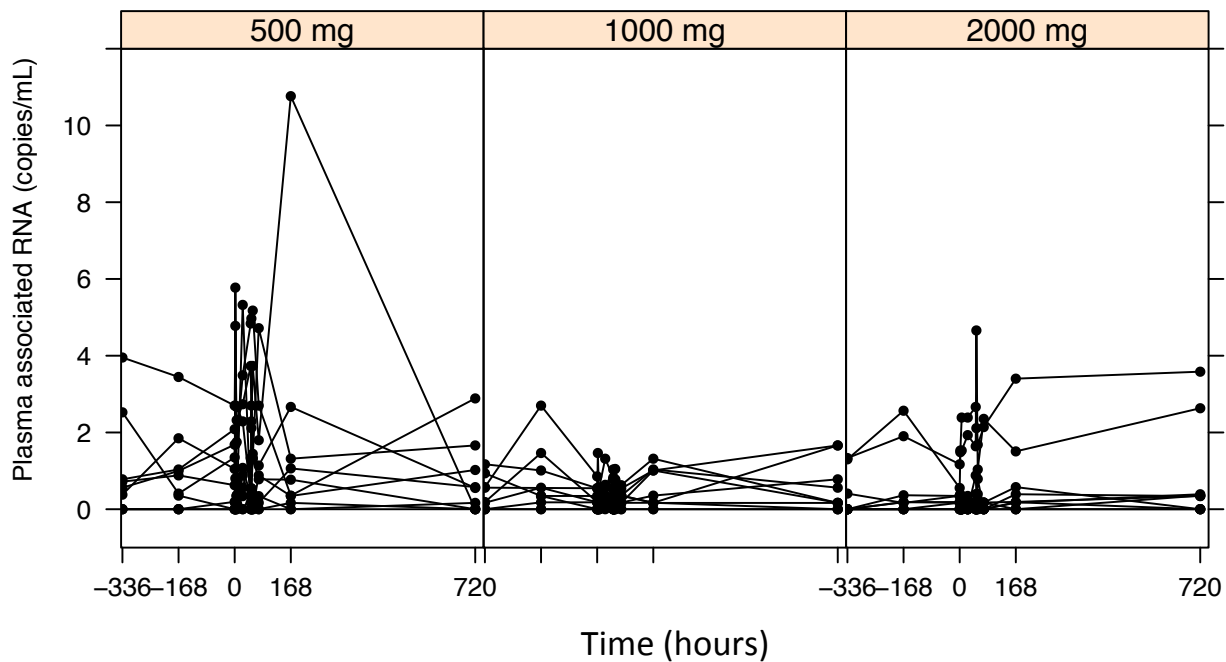

Supplement: NIHMS986651-supplement-Supp_FigS2.pdf [file NIHMS986651-supplement-Supp_FigS2.pdf]
