# Supplementary material
Source: PubMed Central journal article supplement (PMC6379104)

**Figure S3.** Correlation between baseline (mean of 3 baseline values), day 7, and day 31 cell-associated unspliced (CA US) HIV RNA values.

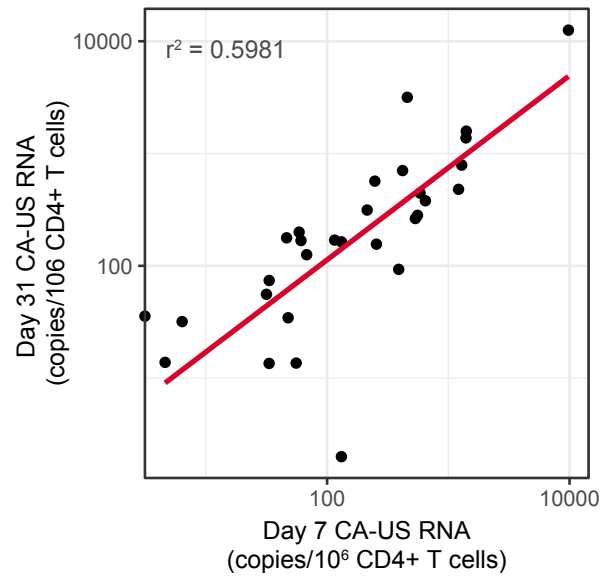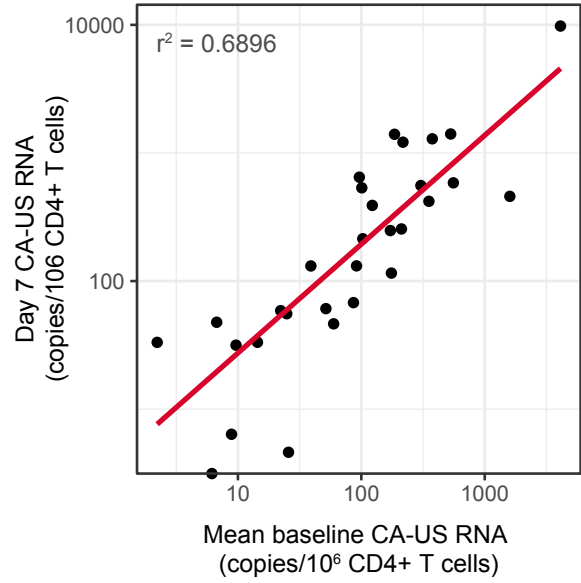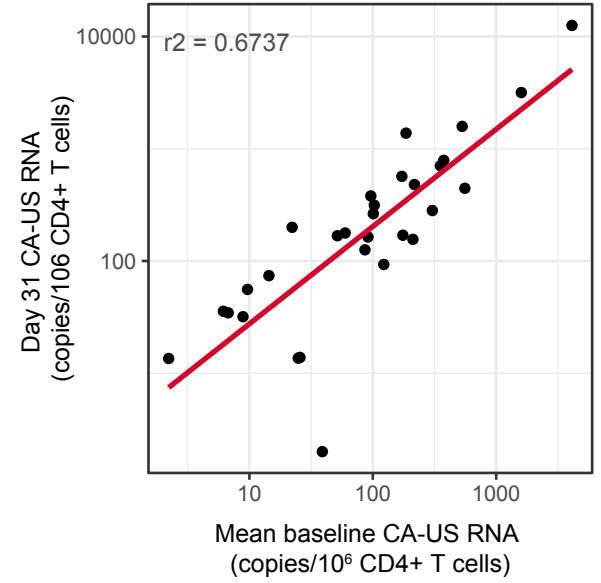

Supplement: NIHMS986651-supplement-Supp_FigS3.pdf [file NIHMS986651-supplement-Supp_FigS3.pdf]
