# Supplementary material
Source: PubMed Central journal article supplement (PMC6379104)

**Figure S4.** Goodness of fit plot for the final exposure-response model of disulfiram concentrations (ng/mL) on cell-associated unspliced (CA-US) HIV RNA (copies/10<sup>6</sup> CD4+ T cells).

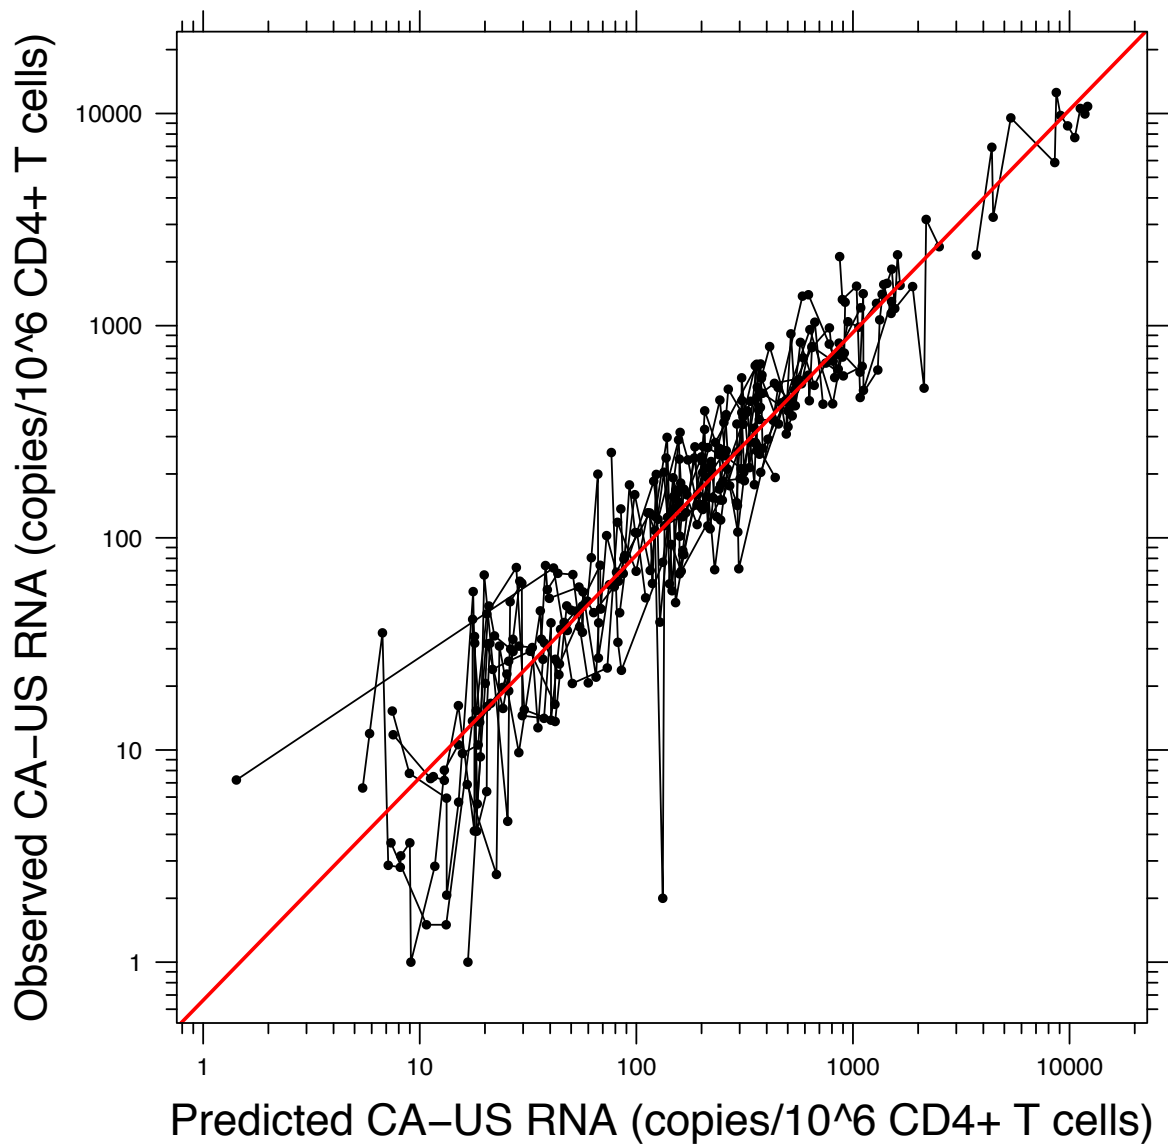

Supplement: NIHMS986651-supplement-Supp_FigS4.pdf [file NIHMS986651-supplement-Supp_FigS4.pdf]
