# Supplementary material
Source: PubMed Central journal article supplement (PMC6379104)

**Figure S5.** Correlation between mean baseline plasma HIV RNA and plasma HIV RNA at the end of study (day 31) (A). Individual (dots) and median (black horizontal bars) baseline plasma HIV RNA by disulfiram dosing group (green = 500 mg, blue = 1000 mg, and red = 2000 mg) with Wilcoxon rank sum comparison p-values (B).

A.

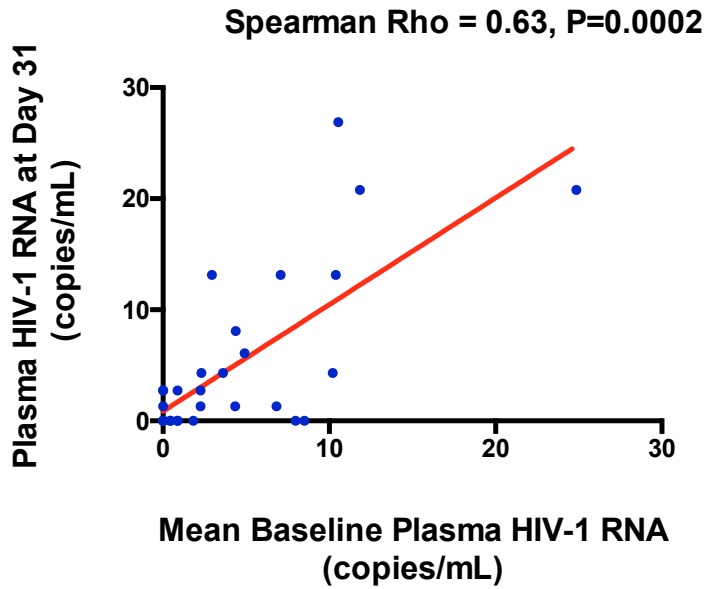

B.

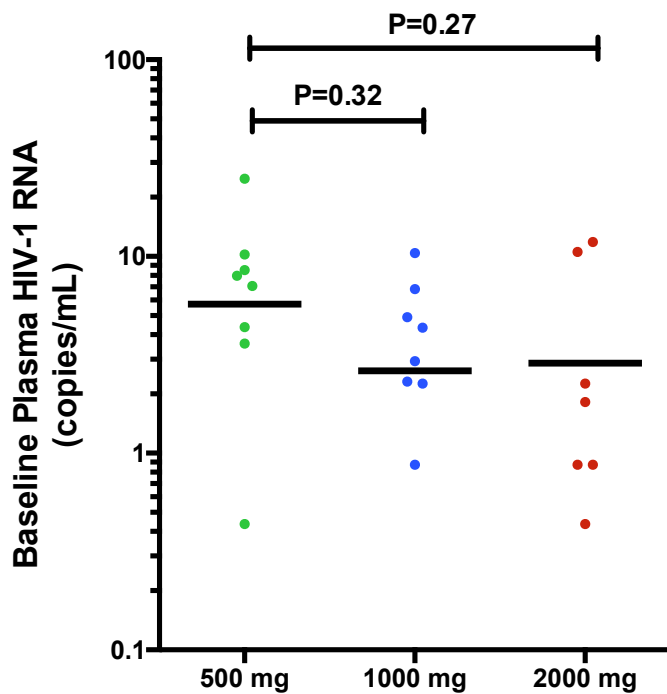

Supplement: NIHMS986651-supplement-Supp_FigS5.pdf [file NIHMS986651-supplement-Supp_FigS5.pdf]
