# Supplementary material
Source: PubMed Central journal article supplement (PMC6379104)
Supplement: NIHMS986651-supplement-Supp_TableS1.pdf [file NIHMS986651-supplement-Supp_TableS1.pdf]

**Table S1.** Pharmacodynamic (PD) model comparisons for the exposure-response analysis of disulfiram and metabolites on cell-associated unspliced HIV RNA. Each metabolite model represents a separate model that included only the metabolite itself. P-values are from likelihood ratio tests comparing models to the reference model.

| Model                                   | -2 Log Likelihood (OFV) | P <sup>a</sup>          | P <sup>b</sup> | df |
|-----------------------------------------|-------------------------|-------------------------|----------------|----|
| <b>No drug effect</b>                   | 4310.33                 | --                      | --             | 0  |
| <b>Drug effect<sup>a</sup></b>          | 4238.98                 | 3.0 x 10 <sup>-17</sup> | --             | 1  |
| <b>Dose effect<sup>b</sup></b>          | 4238.66                 | 1.9 x 10 <sup>-15</sup> | 0.85           | 3  |
| <b>Drug exposure effect<sup>c</sup></b> |                         |                         |                |    |
| <b>AUC<sub>0-72</sub> DSF effect</b>    | 4228.13                 | 6.0 x 10 <sup>-17</sup> | 0.013          | 4  |
| <b>AUC<sub>0-72</sub> M1 effect</b>     | 4229.77                 | 1.3 x 10 <sup>-16</sup> | 0.027          | 4  |
| <b>AUC<sub>0-72</sub> M2 effect</b>     | 4226.60                 | 2.8 x 10 <sup>-17</sup> | 0.006          | 4  |
| <b>AUC<sub>0-72</sub> M3 effect</b>     | 4224.27                 | 9.0 x 10 <sup>-18</sup> | 0.002          | 4  |
| <b>AUC<sub>0-72</sub> M4 effect</b>     | 4224.00                 | 7.9 x 10 <sup>-18</sup> | 0.002          | 4  |

Abbreviations: OFV = objective function value; df = degrees of freedom; AUC = area under the time by concentration curve; DSF = disulfiram; M1-M4 = metabolites 1-4. <sup>a</sup> Reference model is the “No drug effect” model. <sup>b</sup> Reference model is the “Drug effect” model. <sup>c</sup> Drug effect model: changes in CA-US RNA during and after disulfiram administration, with both a fixed and random effect for during/after vs before disulfiram administration. <sup>d</sup> Dose effect: changes in CA-US RNA over time by administered disulfiram dose. <sup>e</sup> Drug exposure effect: changes in CA-US RNA during/after vs before disulfiram administration, by metabolite concentrations measured as the area under the curve.
