# Supplementary material
Source: PubMed Central journal article supplement (PMC6379104)
Supplement: NIHMS986651-supplement-Supp_TableS2.pdf [file NIHMS986651-supplement-Supp_TableS2.pdf]

**Table S2.** Post-hoc analysis pharmacodynamic (PD) model comparisons for the exposure-response analysis of disulfiram and metabolites on cell-associated unspliced HIV RNA, using third baseline value only. Each metabolite model represents a separate model that included only the metabolite itself. P-values are from likelihood ratio tests comparing models to the reference model.

| Model                                   | -2 Log Likelihood (OFV) | P <sup>a</sup>         | P <sup>b</sup> | df |
|-----------------------------------------|-------------------------|------------------------|----------------|----|
| <b>No drug effect</b>                   | 3603.14                 | --                     | --             | 0  |
| <b>Drug effect<sup>c</sup></b>          | 3590.33                 | 3.4 x 10 <sup>-4</sup> | --             | 1  |
| <b>Dose effect<sup>d</sup></b>          | 3589.18                 | 0.003                  | 0.56           | 3  |
| <b>Drug exposure effect<sup>e</sup></b> |                         |                        |                |    |
| <b>AUC<sub>0-72</sub> DSF effect</b>    | 3586.06                 | 0.002                  | 0.23           | 4  |
| <b>AUC<sub>0-72</sub> M1 effect</b>     | 3585.49                 | 0.001                  | 0.18           | 4  |
| <b>AUC<sub>0-72</sub> M2 effect</b>     | 3590.45                 | 0.013                  | 1.0            | 4  |
| <b>AUC<sub>0-72</sub> M3 effect</b>     | 3582.92                 | 4.5 x 10 <sup>-4</sup> | 0.06           | 4  |
| <b>AUC<sub>0-72</sub> M4 effect</b>     | 3588.66                 | 0.006                  | 0.65           | 4  |

Abbreviations: OFV = objective function value; df = degrees of freedom; AUC = area under the time by concentration curve; DSF = disulfiram; M1-M4 = metabolites 1-4. <sup>a</sup> Reference model is the “No drug effect” model. <sup>b</sup> Reference model is the “Drug effect” model. <sup>c</sup> Drug effect model: changes in CA-US RNA during and after disulfiram administration, with both a fixed and random effect for during/after vs before disulfiram administration. <sup>d</sup> Dose effect: changes in CA-US RNA over time by administered disulfiram dose. <sup>e</sup> Drug exposure effect: changes in CA-US RNA during/after vs before disulfiram administration, by metabolite concentrations measured as the area under the curve.
