# Supplementary material
Source: PubMed Central journal article supplement (PMC6379104)
Supplement: NIHMS986651-supplement-Supp_TableS3.pdf [file NIHMS986651-supplement-Supp_TableS3.pdf]

**Table S3.** Pharmacodynamic (PD) model development for the exposure-response analysis of disulfiram and metabolites on plasma HIV-1 RNA. Each metabolite model represents a separate model that included only the metabolite itself. P-values are from likelihood ratio tests comparing models to the reference model.

| <b>Model</b>                            | <b>-2 Log Likelihood (OFV)</b> | <b>P<sup>a</sup></b>   | <b>P<sup>b</sup></b> | <b>df</b> |
|-----------------------------------------|--------------------------------|------------------------|----------------------|-----------|
| <b>No drug effect</b>                   | 1625.40                        | --                     | --                   | 0         |
| <b>Drug effect<sup>a</sup></b>          | 1611.01                        | 1.5 x 10 <sup>-4</sup> | --                   | 1         |
| <b>Dose effect<sup>b</sup></b>          | 1602.05                        | 3.4 x 10 <sup>-5</sup> | 0.01                 | 3         |
| <b>Drug exposure effect<sup>c</sup></b> |                                |                        |                      |           |
| <b>AUC<sub>0-72</sub> DSF effect</b>    | 1610.00                        | 0.004                  | 0.80                 | 4         |
| <b>AUC<sub>0-72</sub> M1 effect</b>     | 1610.26                        | 0.004                  | 0.86                 | 4         |
| <b>AUC<sub>0-72</sub> M2 effect</b>     | 1609.27                        | 0.003                  | 0.63                 | 4         |
| <b>AUC<sub>0-72</sub> M3 effect</b>     | 1608.38                        | 0.002                  | 0.45                 | 4         |
| <b>AUC<sub>0-72</sub> M4 effect</b>     | 1608.26                        | 0.002                  | 0.43                 | 4         |

Abbreviations: OFV = objective function value; df = degrees of freedom; AUC = area under the time by concentration curve; DSF = disulfiram; M1-M4 = metabolites 1-4. <sup>a</sup> Reference model is the “No drug effect” model. <sup>b</sup> Reference model is the “Drug effect” model. <sup>c</sup> Drug effect model: changes in CA-US RNA during and after disulfiram administration, with both a fixed and random effect for during/after vs before disulfiram administration. <sup>d</sup> Dose effect: changes in CA-US RNA over time by administered disulfiram dose. <sup>e</sup> Drug exposure effect: changes in CA-US RNA during/after vs before disulfiram administration, by metabolite concentrations measured as the area under the curve.
